# Supplementary material
Source: HighWire-hosted journal article supplement (https://heart.bmj.com/content/103/21/1687)

## Supplementary Appendix

This appendix has been provided by the authors to give readers additional information about their work.

Supplement to:

Glycaemic control and Excess Risk of Major Coronary Events in Persons with Type 1 Diabetes  
Viktorija Matuleviciene-Anängen MD, Annika Rosengren MD PhD, Ann-Marie Svensson PhD, Aldina Pivodic MSc, Soffia Gudbjörnsdottir MD PhD, Hans Wedel PhD, Mikhail Kosiborod MD, Börje Haraldsson MD PhD, Marcus Lind MD PhD

## **Table of contents**

|                                                                                                                                                                                                                                                  |           |
|--------------------------------------------------------------------------------------------------------------------------------------------------------------------------------------------------------------------------------------------------|-----------|
| Table of contents .....                                                                                                                                                                                                                          | 2         |
| <i>Table 1.1 Adjusted hazard ratios for AMI or CHD death and 95% confidence intervals for time-updated mean HbA1c categories, albuminuria categories and eGFR categories versus the reference group examined by Cox regression .....</i>         | <i>4</i>  |
| <i>Table 1.2 Men - Adjusted hazard ratios for AMI or CHD death and 95% confidence intervals for time-updated mean HbA1c categories, albuminuria categories and eGFR categories versus the reference group examined by Cox regression .....</i>   | <i>5</i>  |
| <i>Table 1.3 Women - Adjusted hazard ratios for AMI or CHD death and 95% confidence intervals for time-updated mean HbA1c categories, albuminuria categories and eGFR categories versus the reference group examined by Cox regression .....</i> | <i>6</i>  |
| <i>Table 2.1 Adjusted hazard ratios for AMI or CHD death and 95% confidence intervals for time-updated mean HbA1c categories together with albuminuria and eGFR versus the reference group examined by Cox regression.....</i>                   | <i>7</i>  |
| <i>Table 2.2 Men - Adjusted hazard ratios for AMI or CHD death and 95% confidence intervals for time-updated mean HbA1c categories together with albuminuria and eGFR versus the reference group examined by Cox regression.....</i>             | <i>8</i>  |
| <i>Table 2.3 Adjusted hazard ratios for AMI or CHD death and 95% confidence intervals for time-updated mean HbA1c categories together with albuminuria and eGFR versus the reference group examined by Cox regression - Women .....</i>          | <i>9</i>  |
| <i>Table 3. Risk factors of coronary events in males and females with type 1 diabetes Male vs Female with respect to patient characteristics and medical data during study before AMI/CHD death.</i>                                             | <i>10</i> |
| <i>Figure 1. Hazard ratios and CIs for male and female diabetic patients (Model 3) - effect of various HbA1c categories vs 48-52 mmol/mol on time to first AMI or CHD death.....</i>                                                             | <i>12</i> |



**Table 1.1 Adjusted hazard ratios for AMI or CHD death and 95% confidence intervals for time-updated mean HbA1c categories, albuminuria categories and eGFR categories versus the reference group examined by Cox regression**

|                                                                                                                                                                                                              | Hazard ratio (95% CI)<br>p-value                        |                                                         |                                                         |
|--------------------------------------------------------------------------------------------------------------------------------------------------------------------------------------------------------------|---------------------------------------------------------|---------------------------------------------------------|---------------------------------------------------------|
|                                                                                                                                                                                                              | Model 1                                                 | Model 2                                                 | Model 3                                                 |
| <b>AMI or CHD death</b>                                                                                                                                                                                      |                                                         |                                                         |                                                         |
| <b>Time updated mean HbA1c categories</b>                                                                                                                                                                    | n events=3414<br>N subjects=197677<br>data used = 99.9% | n events=3414<br>N subjects=197677<br>data used = 99.9% | n events=3389<br>N subjects=195416<br>data used = 98.8% |
| <b>Controls (reference)</b>                                                                                                                                                                                  | 1.00                                                    | 1.00                                                    | 1.00                                                    |
| <b>&lt;=6.9% (&lt;=52 mmol/mol)</b>                                                                                                                                                                          | 2.54 (2.14 - 3.01)<br><.0001                            | 1.87 (1.46 - 2.41)<br><.0001                            | 2.02 (1.57 - 2.60)<br><.0001                            |
| <b>7.0-7.8% (53-62 mmol/mol)</b>                                                                                                                                                                             | 3.35 (2.99 - 3.74)<br><.0001                            | 2.41 (1.95 - 2.97)<br><.0001                            | 2.51 (2.03 - 3.11)<br><.0001                            |
| <b>7.9-8.7% (63-72 mmol/mol)</b>                                                                                                                                                                             | 4.46 (4.04 - 4.93)<br><.0001                            | 3.18 (2.60 - 3.88)<br><.0001                            | 3.28 (2.68 - 4.01)<br><.0001                            |
| <b>8.8-9.6% 73-82 (mmol/mol)</b>                                                                                                                                                                             | 6.20 (5.48 - 7.02)<br><.0001                            | 4.44 (3.60 - 5.47)<br><.0001                            | 4.33 (3.51 - 5.34)<br><.0001                            |
| <b>&gt;=9.7% (&gt;=83 mmol/mol)</b>                                                                                                                                                                          | 11.98 (10.36 - 13.86)<br><.0001                         | 8.86 (7.10 - 11.07)<br><.0001                           | 8.70 (6.98 - 10.86)<br><.0001                           |
| <b>Time updated albuminuria categories</b>                                                                                                                                                                   | n events=3015<br>N subjects=194785<br>data used = 98.4% | n events=3015<br>N subjects=194785<br>data used = 98.4% | n events=2992<br>N subjects=192583<br>data used = 97.3% |
| <b>Controls (reference)</b>                                                                                                                                                                                  | 1.00                                                    | 1.00                                                    | 1.00                                                    |
| <b>Normoalbuminuria</b>                                                                                                                                                                                      | 2.75 (2.49 - 3.05)<br><.0001                            | 2.78 (2.24 - 3.46)<br><.0001                            | 2.94 (2.36 - 3.65)<br><.0001                            |
| <b>Microalbuminuria</b>                                                                                                                                                                                      | 5.04 (4.43 - 5.74)<br><.0001                            | 5.03 (3.93 - 6.46)<br><.0001                            | 4.95 (3.86 - 6.35)<br><.0001                            |
| <b>Macroalbuminuria</b>                                                                                                                                                                                      | 9.89 (8.67 - 11.28)<br><.0001                           | 9.59 (7.49 - 12.28)<br><.0001                           | 9.07 (7.08 - 11.61)<br><.0001                           |
| <b>CKD stage 5</b>                                                                                                                                                                                           | 24.50 (20.20 - 29.72)<br><.0001                         | 22.53 (16.97 - 29.90)<br><.0001                         | 20.16 (15.18 - 26.77)<br><.0001                         |
| <b>Time updated eGFR categories</b>                                                                                                                                                                          | n events=3019<br>N subjects=195617<br>data used = 98.9% | n events=3019<br>N subjects=195617<br>data used = 98.9% | n events=2996<br>N subjects=193391<br>data used = 97.7% |
| <b>Controls (reference)</b>                                                                                                                                                                                  | 1.00                                                    | 1.00                                                    | 1.00                                                    |
| <b>CKD stage 1 (eGFR &gt;=90)</b>                                                                                                                                                                            | 2.52 (2.21 - 2.88)<br><.0001                            | 2.84 (2.27 - 3.56)<br><.0001                            | 2.95 (2.36 - 3.70)<br><.0001                            |
| <b>CKD stage 2 (eGFR 60-89)</b>                                                                                                                                                                              | 3.77 (3.38 - 4.20)<br><.0001                            | 4.17 (3.31 - 5.26)<br><.0001                            | 4.23 (3.36 - 5.34)<br><.0001                            |
| <b>CKD stage 3 (eGFR 30-59)</b>                                                                                                                                                                              | 6.38 (5.59 - 7.28)<br><.0001                            | 7.43 (5.70 - 9.69)<br><.0001                            | 6.94 (5.32 - 9.05)<br><.0001                            |
| <b>CKD stage 4 (eGFR 15-29)</b>                                                                                                                                                                              | 14.72 (11.61 - 18.65)<br><.0001                         | 15.67 (11.43 - 21.47)<br><.0001                         | 14.87 (10.85 - 20.38)<br><.0001                         |
| <b>CKD stage 5 (eGFR &lt;15, dialysis or transplantation)</b>                                                                                                                                                | 24.35 (20.09 - 29.51)<br><.0001                         | 25.07 (18.88 - 33.28)<br><.0001                         | 22.00 (16.54 - 29.25)<br><.0001                         |
| <b>Time updated eGFR (CKD-EPI) categories</b>                                                                                                                                                                | n events=3019<br>N subjects=195617<br>data used = 98.9% | n events=3019<br>N subjects=195617<br>data used = 98.9% | n events=2996<br>N subjects=193391<br>data used = 97.7% |
| <b>Controls (reference)</b>                                                                                                                                                                                  | 1.00                                                    | 1.00                                                    | 1.00                                                    |
| <b>CKD stage 1 (eGFR &gt;=90)</b>                                                                                                                                                                            | 2.65 (2.32 - 3.01)<br><.0001                            | 3.17 (2.58 - 3.90)<br><.0001                            | 3.26 (2.65 - 4.00)<br><.0001                            |
| <b>CKD stage 2 (eGFR 60-89)</b>                                                                                                                                                                              | 3.65 (3.27 - 4.07)<br><.0001                            | 4.59 (3.64 - 5.79)<br><.0001                            | 4.63 (3.67 - 5.84)<br><.0001                            |
| <b>CKD stage 3 (eGFR 30-59)</b>                                                                                                                                                                              | 6.11 (5.35 - 6.98)<br><.0001                            | 7.90 (6.06 - 10.30)<br><.0001                           | 7.31 (5.60 - 9.54)<br><.0001                            |
| <b>CKD stage 4 (eGFR 15-29)</b>                                                                                                                                                                              | 14.13 (11.23 - 17.77)<br><.0001                         | 17.87 (13.10 - 24.38)<br><.0001                         | 17.27 (12.67 - 23.54)<br><.0001                         |
| <b>CKD stage 5 (eGFR &lt;15, dialysis or transplantation)</b>                                                                                                                                                | 23.93 (19.81 - 28.92)<br><.0001                         | 30.02 (22.76 - 39.59)<br><.0001                         | 27.08 (20.52 - 35.74)<br><.0001                         |
| Model 1: adjusted for time-updated age and sex<br>Model 2: additionally adjusted diabetes duration<br>Model 3: additionally adjusted for born in Sweden, maximum education level and baseline comorbidities. |                                                         |                                                         |                                                         |

**Table 1.2 Men - Adjusted hazard ratios for AMI or CHD death and 95% confidence intervals for time-updated mean HbA1c categories, albuminuria categories and eGFR categories versus the reference group examined by Cox regression**

|                                                                                                                                                                                                      | Hazard ratio (95% CI)<br>p-value                        |                                                         |                                                         |
|------------------------------------------------------------------------------------------------------------------------------------------------------------------------------------------------------|---------------------------------------------------------|---------------------------------------------------------|---------------------------------------------------------|
|                                                                                                                                                                                                      | Model 1                                                 | Model 2                                                 | Model 3                                                 |
| <b>AMI or CHD death</b>                                                                                                                                                                              |                                                         |                                                         |                                                         |
| <b>Time updated mean HbA1c categories</b>                                                                                                                                                            | n events=2194<br>N subjects=108124<br>data used = 99.9% | n events=2194<br>N subjects=108124<br>data used = 99.9% | n events=2184<br>N subjects=106800<br>data used = 98.7% |
| Controls (reference)                                                                                                                                                                                 | 1.00                                                    | 1.00                                                    | 1.00                                                    |
| <=6.9% (<=52 mmol/mol)                                                                                                                                                                               | 1.82 (1.45 - 2.29)<br><.0001                            | 1.43 (1.03 - 1.98)<br>0.035                             | 1.58 (1.14 - 2.20)<br>0.0067                            |
| 7.0-7.8% (53-62 mmol/mol)                                                                                                                                                                            | 2.70 (2.34 - 3.12)<br><.0001                            | 2.05 (1.56 - 2.69)<br><.0001                            | 2.19 (1.67 - 2.89)<br><.0001                            |
| 7.9-8.7% (63-72 mmol/mol)                                                                                                                                                                            | 3.22 (2.82 - 3.68)<br><.0001                            | 2.39 (1.84 - 3.11)<br><.0001                            | 2.54 (1.96 - 3.30)<br><.0001                            |
| 8.8-9.6% 73-82 (mmol/mol)                                                                                                                                                                            | 4.53 (3.83 - 5.34)<br><.0001                            | 3.36 (2.56 - 4.42)<br><.0001                            | 3.45 (2.62 - 4.53)<br><.0001                            |
| >=9.7% (>=83 mmol/mol)                                                                                                                                                                               | 7.98 (6.45 - 9.87)<br><.0001                            | 6.22 (4.59 - 8.42)<br><.0001                            | 6.39 (4.73 - 8.64)<br><.0001                            |
| <b>Time updated albuminuria categories</b>                                                                                                                                                           | n events=1969<br>N subjects=106510<br>data used = 98.4% | n events=1969<br>N subjects=106510<br>data used = 98.4% | n events=1960<br>N subjects=105219<br>data used = 97.2% |
| Controls (reference)                                                                                                                                                                                 | 1.00                                                    | 1.00                                                    | 1.00                                                    |
| Normoalbuminuria                                                                                                                                                                                     | 1.84 (1.60 - 2.12)<br><.0001                            | 1.96 (1.47 - 2.62)<br><.0001                            | 2.12 (1.59 - 2.83)<br><.0001                            |
| Microalbuminuria                                                                                                                                                                                     | 3.32 (2.78 - 3.96)<br><.0001                            | 3.48 (2.50 - 4.84)<br><.0001                            | 3.48 (2.50 - 4.84)<br><.0001                            |
| Macroalbuminuria                                                                                                                                                                                     | 7.22 (6.12 - 8.51)<br><.0001                            | 7.29 (5.29 - 10.06)<br><.0001                           | 6.95 (5.04 - 9.59)<br><.0001                            |
| CKD stage 5                                                                                                                                                                                          | 18.12 (14.05 - 23.37)<br><.0001                         | 17.09 (11.78 - 24.80)<br><.0001                         | 15.64 (10.78 - 22.68)<br><.0001                         |
| <b>Time updated eGFR categories</b>                                                                                                                                                                  | n events=1972<br>N subjects=106972<br>data used = 98.8% | n events=1972<br>N subjects=106972<br>data used = 98.8% | n events=1963<br>N subjects=105665<br>data used = 97.6% |
| Controls (reference)                                                                                                                                                                                 | 1.00                                                    | 1.00                                                    | 1.00                                                    |
| CKD stage 1 (eGFR >=90)                                                                                                                                                                              | 1.96 (1.67 - 2.30)<br><.0001                            | 2.16 (1.61 - 2.90)<br><.0001                            | 2.29 (1.71 - 3.07)<br><.0001                            |
| CKD stage 2 (eGFR 60-89)                                                                                                                                                                             | 2.72 (2.34 - 3.15)<br><.0001                            | 2.96 (2.17 - 4.04)<br><.0001                            | 3.07 (2.25 - 4.19)<br><.0001                            |
| CKD stage 3 (eGFR 30-59)                                                                                                                                                                             | 4.84 (3.98 - 5.88)<br><.0001                            | 5.57 (3.88 - 8.00)<br><.0001                            | 5.07 (3.53 - 7.30)<br><.0001                            |
| CKD stage 4 (eGFR 15-29)                                                                                                                                                                             | 11.04 (8.00 - 15.24)<br><.0001                          | 11.24 (7.39 - 17.11)<br><.0001                          | 11.06 (7.27 - 16.82)<br><.0001                          |
| CKD stage 5 (eGFR <15, dialysis or transplantation)                                                                                                                                                  | 17.96 (13.93 - 23.17)<br><.0001                         | 17.66 (12.15 - 25.65)<br><.0001                         | 15.84 (10.90 - 23.02)<br><.0001                         |
| <b>Time updated eGFR (CKD-EPI) categories</b>                                                                                                                                                        | n events=1972<br>N subjects=106972<br>data used = 98.8% | n events=1972<br>N subjects=106972<br>data used = 98.8% | n events=1963<br>N subjects=105665<br>data used = 97.6% |
| Controls (reference)                                                                                                                                                                                 | 1.00                                                    | 1.00                                                    | 1.00                                                    |
| CKD stage 1 (eGFR >=90)                                                                                                                                                                              | 2.01 (1.71 - 2.36)<br><.0001                            | 2.36 (1.81 - 3.08)<br><.0001                            | 2.47 (1.89 - 3.21)<br><.0001                            |
| CKD stage 2 (eGFR 60-89)                                                                                                                                                                             | 2.63 (2.26 - 3.06)<br><.0001                            | 3.26 (2.38 - 4.46)<br><.0001                            | 3.34 (2.44 - 4.56)<br><.0001                            |
| CKD stage 3 (eGFR 30-59)                                                                                                                                                                             | 4.48 (3.68 - 5.44)<br><.0001                            | 5.66 (3.94 - 8.13)<br><.0001                            | 5.18 (3.60 - 7.45)<br><.0001                            |
| CKD stage 4 (eGFR 15-29)                                                                                                                                                                             | 10.98 (8.05 - 14.98)<br><.0001                          | 13.48 (8.96 - 20.30)<br><.0001                          | 13.37 (8.89 - 20.12)<br><.0001                          |
| CKD stage 5 (eGFR <15, dialysis or transplantation)                                                                                                                                                  | 17.65 (13.76 - 22.64)<br><.0001                         | 21.64 (15.07 - 31.07)<br><.0001                         | 19.82 (13.80 - 28.45)<br><.0001                         |
| Model 1: adjusted for time-updated age<br>Model 2: additionally adjusted diabetes duration<br>Model 3: additionally adjusted for born in Sweden, maximum education level and baseline comorbidities. |                                                         |                                                         |                                                         |

**Table 1.3 Women - Adjusted hazard ratios for AMI or CHD death and 95% confidence intervals for time-updated mean HbA1c categories, albuminuria categories and eGFR categories versus the reference group examined by Cox regression**

|                                                                                                                                                                                                      | Hazard ratio (95% CI)<br>p-value                       |                                                        |                                                        |
|------------------------------------------------------------------------------------------------------------------------------------------------------------------------------------------------------|--------------------------------------------------------|--------------------------------------------------------|--------------------------------------------------------|
|                                                                                                                                                                                                      | Model 1                                                | Model 2                                                | Model 3                                                |
| <b>AMI or CHD death</b>                                                                                                                                                                              |                                                        |                                                        |                                                        |
| <b>Time updated mean HbA1c categories</b>                                                                                                                                                            | n events=1220<br>N subjects=89553<br>data used = 99.9% | n events=1220<br>N subjects=89553<br>data used = 99.9% | n events=1205<br>N subjects=88616<br>data used = 98.9% |
| Controls (reference)                                                                                                                                                                                 | 1.00                                                   | 1.00                                                   | 1.00                                                   |
| <=6.9% (<=52 mmol/mol)                                                                                                                                                                               | 4.64 (3.58 - 6.01)<br><.0001                           | 4.09 (2.76 - 6.07)<br><.0001                           | 4.23 (2.85 - 6.29)<br><.0001                           |
| 7.0-7.8% (53-62 mmol/mol)                                                                                                                                                                            | 5.10 (4.25 - 6.13)<br><.0001                           | 4.43 (3.14 - 6.25)<br><.0001                           | 4.50 (3.18 - 6.37)<br><.0001                           |
| 7.9-8.7% (63-72 mmol/mol)                                                                                                                                                                            | 7.76 (6.64 - 9.06)<br><.0001                           | 6.69 (4.84 - 9.26)<br><.0001                           | 6.67 (4.82 - 9.25)<br><.0001                           |
| 8.8-9.6% 73-82 (mmol/mol)                                                                                                                                                                            | 10.72 (8.86 - 12.96)<br><.0001                         | 9.25 (6.61 - 12.96)<br><.0001                          | 8.23 (5.86 - 11.55)<br><.0001                          |
| >=9.7% (>=83 mmol/mol)                                                                                                                                                                               | 21.20 (17.26 - 26.03)<br><.0001                        | 18.62 (13.20 - 26.27)<br><.0001                        | 16.80 (11.91 - 23.70)<br><.0001                        |
| <b>Time updated albuminuria categories</b>                                                                                                                                                           | n events=1046<br>N subjects=88275<br>data used = 98.5% | n events=1046<br>N subjects=88275<br>data used = 98.5% | n events=1032<br>N subjects=87364<br>data used = 97.5% |
| Controls (reference)                                                                                                                                                                                 | 1.00                                                   | 1.00                                                   | 1.00                                                   |
| Normoalbuminuria                                                                                                                                                                                     | 5.05 (4.34 - 5.88)<br><.0001                           | 7.10 (5.02 - 10.05)<br><.0001                          | 7.37 (5.21 - 10.43)<br><.0001                          |
| Microalbuminuria                                                                                                                                                                                     | 10.67 (8.77 - 12.99)<br><.0001                         | 15.47 (10.43 - 22.93)<br><.0001                        | 15.21 (10.26 - 22.55)<br><.0001                        |
| Macroalbuminuria                                                                                                                                                                                     | 20.09 (16.15 - 24.99)<br><.0001                        | 28.46 (19.01 - 42.62)<br><.0001                        | 26.89 (17.92 - 40.34)<br><.0001                        |
| CKD stage 5                                                                                                                                                                                          | 43.20 (32.04 - 58.24)<br><.0001                        | 59.02 (37.60 - 92.67)<br><.0001                        | 53.37 (33.73 - 84.44)<br><.0001                        |
| <b>Time updated eGFR categories</b>                                                                                                                                                                  | n events=1047<br>N subjects=88645<br>data used = 98.9% | n events=1047<br>N subjects=88645<br>data used = 98.9% | n events=1033<br>N subjects=87726<br>data used = 97.9% |
| Controls (reference)                                                                                                                                                                                 | 1.00                                                   | 1.00                                                   | 1.00                                                   |
| CKD stage 1 (eGFR >=90)                                                                                                                                                                              | 4.81 (3.81 - 6.08)<br><.0001                           | 6.94 (4.78 - 10.08)<br><.0001                          | 7.15 (4.93 - 10.39)<br><.0001                          |
| CKD stage 2 (eGFR 60-89)                                                                                                                                                                             | 6.32 (5.38 - 7.43)<br><.0001                           | 9.18 (6.41 - 13.14)<br><.0001                          | 9.17 (6.39 - 13.17)<br><.0001                          |
| CKD stage 3 (eGFR 30-59)                                                                                                                                                                             | 9.18 (7.62 - 11.06)<br><.0001                          | 14.28 (9.52 - 21.41)<br><.0001                         | 13.90 (9.25 - 20.89)<br><.0001                         |
| CKD stage 4 (eGFR 15-29)                                                                                                                                                                             | 24.06 (16.92 - 34.21)<br><.0001                        | 35.40 (21.61 - 58.00)<br><.0001                        | 31.34 (19.08 - 51.48)<br><.0001                        |
| CKD stage 5 (eGFR <15, dialysis or transplantation)                                                                                                                                                  | 43.32 (32.23 - 58.24)<br><.0001                        | 61.87 (39.39 - 97.18)<br><.0001                        | 54.56 (34.40 - 86.52)<br><.0001                        |
| <b>Time updated eGFR (CKD-EPI) categories</b>                                                                                                                                                        | n events=1047<br>N subjects=88645<br>data used = 98.9% | n events=1047<br>N subjects=88645<br>data used = 98.9% | n events=1033<br>N subjects=87726<br>data used = 97.9% |
| Controls (reference)                                                                                                                                                                                 | 1.00                                                   | 1.00                                                   | 1.00                                                   |
| CKD stage 1 (eGFR >=90)                                                                                                                                                                              | 5.04 (4.03 - 6.29)<br><.0001                           | 7.40 (5.23 - 10.46)<br><.0001                          | 7.41 (5.25 - 10.45)<br><.0001                          |
| CKD stage 2 (eGFR 60-89)                                                                                                                                                                             | 6.23 (5.28 - 7.36)<br><.0001                           | 9.93 (6.92 - 14.24)<br><.0001                          | 9.85 (6.86 - 14.15)<br><.0001                          |
| CKD stage 3 (eGFR 30-59)                                                                                                                                                                             | 9.14 (7.57 - 11.03)<br><.0001                          | 15.41 (10.28 - 23.12)<br><.0001                        | 14.39 (9.57 - 21.62)<br><.0001                         |
| CKD stage 4 (eGFR 15-29)                                                                                                                                                                             | 21.63 (15.36 - 30.47)<br><.0001                        | 36.22 (22.13 - 59.28)<br><.0001                        | 33.39 (20.43 - 54.58)<br><.0001                        |
| CKD stage 5 (eGFR <15, dialysis or transplantation)                                                                                                                                                  | 42.96 (32.04 - 57.59)<br><.0001                        | 69.94 (44.78 - 109.24)<br><.0001                       | 62.72 (39.87 - 98.65)<br><.0001                        |
| Model 1: adjusted for time-updated age<br>Model 2: additionally adjusted diabetes duration<br>Model 3: additionally adjusted for born in Sweden, maximum education level and baseline comorbidities. |                                                        |                                                        |                                                        |

**Table 2.1 Adjusted hazard ratios for AMI or CHD death and 95% confidence intervals for time-updated mean HbA1c categories together with albuminuria and eGFR versus the reference group examined by Cox regression**

| AMI or CHD death                                                                                                                                                                                                  | Hazard ratio (95% CI)<br>p-value                        |                                                         |                                                         |
|-------------------------------------------------------------------------------------------------------------------------------------------------------------------------------------------------------------------|---------------------------------------------------------|---------------------------------------------------------|---------------------------------------------------------|
|                                                                                                                                                                                                                   | Model 1                                                 | Model 2                                                 | Model 3                                                 |
| <b>Time updated mean HbA1c categories and albuminuria</b>                                                                                                                                                         | n events=3014<br>N subjects=194755<br>data used = 98.4% | n events=3014<br>N subjects=194755<br>data used = 98.4% | n events=2991<br>N subjects=192554<br>data used = 97.3% |
| Controls (reference)                                                                                                                                                                                              | 1.00                                                    | 1.00                                                    | 1.00                                                    |
| <=6.9% (<=52 mmol/mol) - Normoalbuminuria                                                                                                                                                                         | 1.71 (1.31 - 2.23)<br><.0001                            | 1.77 (1.36 - 2.31)<br><.0001                            | 1.80 (1.38 - 2.35)<br><.0001                            |
| 7.0-7.8% (53-62 mmol/mol) - Normoalbuminuria                                                                                                                                                                      | 2.37 (2.00 - 2.81)<br><.0001                            | 2.37 (2.00 - 2.81)<br><.0001                            | 2.33 (1.96 - 2.76)<br><.0001                            |
| 7.9-8.7% (63-72 mmol/mol) - Normoalbuminuria                                                                                                                                                                      | 2.77 (2.35 - 3.28)<br><.0001                            | 2.75 (2.33 - 3.25)<br><.0001                            | 2.63 (2.22 - 3.11)<br><.0001                            |
| 8.8-9.6% 73-82 (mmol/mol) - Normoalbuminuria                                                                                                                                                                      | 4.56 (3.65 - 5.69)<br><.0001                            | 4.56 (3.65 - 5.69)<br><.0001                            | 4.15 (3.32 - 5.18)<br><.0001                            |
| >=9.7% (>=83 mmol/mol) - Normoalbuminuria                                                                                                                                                                         | 7.88 (5.71 - 10.87)<br><.0001                           | 8.34 (6.04 - 11.51)<br><.0001                           | 7.61 (5.51 - 10.50)<br><.0001                           |
| <=6.9% (<=52 mmol/mol) - Not Normoalbuminuria                                                                                                                                                                     | 4.68 (3.51 - 6.26)<br><.0001                            | 4.66 (3.49 - 6.23)<br><.0001                            | 4.11 (3.07 - 5.50)<br><.0001                            |
| 7.0-7.8% (53-62 mmol/mol) - Not Normoalbuminuria                                                                                                                                                                  | 5.75 (4.85 - 6.82)<br><.0001                            | 5.67 (4.78 - 6.73)<br><.0001                            | 4.89 (4.11 - 5.83)<br><.0001                            |
| 7.9-8.7% (63-72 mmol/mol) - Not Normoalbuminuria                                                                                                                                                                  | 7.75 (6.72 - 8.94)<br><.0001                            | 7.51 (6.51 - 8.66)<br><.0001                            | 6.84 (5.92 - 7.91)<br><.0001                            |
| 8.8-9.6% 73-82 (mmol/mol) - Not Normoalbuminuria                                                                                                                                                                  | 8.41 (7.00 - 10.10)<br><.0001                           | 8.06 (6.71 - 9.69)<br><.0001                            | 7.04 (5.85 - 8.47)<br><.0001                            |
| >=9.7% (>=83 mmol/mol) - Not Normoalbuminuria                                                                                                                                                                     | 19.81 (16.19 - 24.24)<br><.0001                         | 18.98 (15.51 - 23.24)<br><.0001                         | 16.28 (13.27 - 19.97)<br><.0001                         |
| <b>Time updated mean HbA1c categories and eGFR</b>                                                                                                                                                                | n events=3019<br>N subjects=195570<br>data used = 98.8% | n events=3019<br>N subjects=195570<br>data used = 98.8% | n events=2996<br>N subjects=193346<br>data used = 97.7% |
| Controls (reference)                                                                                                                                                                                              | 1.00                                                    | 1.00                                                    | 1.00                                                    |
| <=6.9% (<=52 mmol/mol) - eGFR>=60                                                                                                                                                                                 | 1.74 (1.35 - 2.23)<br><.0001                            | 1.80 (1.40 - 2.31)<br><.0001                            | 1.80 (1.40 - 2.32)<br><.0001                            |
| 7.0-7.8% (53-62 mmol/mol) - eGFR>=60                                                                                                                                                                              | 2.52 (2.16 - 2.94)<br><.0001                            | 2.51 (2.15 - 2.93)<br><.0001                            | 2.44 (2.09 - 2.85)<br><.0001                            |
| 7.9-8.7% (63-72 mmol/mol) - eGFR>=60                                                                                                                                                                              | 3.52 (3.08 - 4.03)<br><.0001                            | 3.46 (3.02 - 3.97)<br><.0001                            | 3.29 (2.87 - 3.78)<br><.0001                            |
| 8.8-9.6% 73-82 (mmol/mol) - eGFR>=60                                                                                                                                                                              | 4.65 (3.87 - 5.58)<br><.0001                            | 4.59 (3.82 - 5.51)<br><.0001                            | 4.19 (3.49 - 5.04)<br><.0001                            |
| >=9.7% (>=83 mmol/mol) - eGFR>=60                                                                                                                                                                                 | 7.99 (6.14 - 10.39)<br><.0001                           | 8.25 (6.34 - 10.73)<br><.0001                           | 7.55 (5.80 - 9.82)<br><.0001                            |
| <=6.9% (<=52 mmol/mol) - eGFR<60                                                                                                                                                                                  | 5.56 (4.08 - 7.59)<br><.0001                            | 5.58 (4.09 - 7.61)<br><.0001                            | 4.95 (3.63 - 6.77)<br><.0001                            |
| 7.0-7.8% (53-62 mmol/mol) - eGFR<60                                                                                                                                                                               | 6.96 (5.77 - 8.41)<br><.0001                            | 6.98 (5.78 - 8.43)<br><.0001                            | 5.91 (4.87 - 7.17)<br><.0001                            |
| 7.9-8.7% (63-72 mmol/mol) - eGFR<60                                                                                                                                                                               | 7.91 (6.58 - 9.50)<br><.0001                            | 7.84 (6.53 - 9.42)<br><.0001                            | 7.06 (5.87 - 8.50)<br><.0001                            |
| 8.8-9.6% 73-82 (mmol/mol) - eGFR<60                                                                                                                                                                               | 11.40 (9.07 - 14.32)<br><.0001                          | 10.94 (8.71 - 13.75)<br><.0001                          | 9.18 (7.28 - 11.56)<br><.0001                           |
| >=9.7% (>=83 mmol/mol) - eGFR<60                                                                                                                                                                                  | 26.73 (21.34 - 33.48)<br><.0001                         | 25.66 (20.48 - 32.16)<br><.0001                         | 21.53 (17.13 - 27.07)<br><.0001                         |
| Model 1: adjusted for time-updated age and sex<br>Model 2: additionally stratified by diabetes duration<br>Model 3: additionally adjusted for born in Sweden, maximum education level and baseline comorbidities. |                                                         |                                                         |                                                         |

**Table 2.2 Men - Adjusted hazard ratios for AMI or CHD death and 95% confidence intervals for time-updated mean HbA1c categories together with albuminuria and eGFR versus the reference group examined by Cox regression**

| AMI or CHD death                                                                                                                                                                                          | Hazard ratio (95% CI)<br>p-value                        |                                                         |                                                         |
|-----------------------------------------------------------------------------------------------------------------------------------------------------------------------------------------------------------|---------------------------------------------------------|---------------------------------------------------------|---------------------------------------------------------|
|                                                                                                                                                                                                           | Model 1                                                 | Model 2                                                 | Model 3                                                 |
| Time updated mean HbA1c categories and albuminuria                                                                                                                                                        | n events=1969<br>N subjects=106493<br>data used = 98.4% | n events=1969<br>N subjects=106493<br>data used = 98.4% | n events=1960<br>N subjects=105202<br>data used = 97.2% |
| Controls (reference)                                                                                                                                                                                      | 1.00                                                    | 1.00                                                    | 1.00                                                    |
| <=6.9% (<=52 mmol/mol) - Normoalbuminuria                                                                                                                                                                 | 1.19 (0.83 - 1.72)<br>0.35                              | 1.26 (0.87 - 1.82)<br>0.22                              | 1.30 (0.90 - 1.88)<br>0.16                              |
| 7.0-7.8% (53-62 mmol/mol) - Normoalbuminuria                                                                                                                                                              | 1.78 (1.42 - 2.25)<br><.0001                            | 1.80 (1.43 - 2.26)<br><.0001                            | 1.81 (1.44 - 2.28)<br><.0001                            |
| 7.9-8.7% (63-72 mmol/mol) - Normoalbuminuria                                                                                                                                                              | 1.70 (1.32 - 2.19)<br><.0001                            | 1.68 (1.31 - 2.17)<br><.0001                            | 1.64 (1.27 - 2.12)<br>0.0001                            |
| 8.8-9.6% 73-82 (mmol/mol) - Normoalbuminuria                                                                                                                                                              | 3.13 (2.27 - 4.32)<br><.0001                            | 3.11 (2.25 - 4.29)<br><.0001                            | 3.04 (2.20 - 4.20)<br><.0001                            |
| >=9.7% (>=83 mmol/mol) - Normoalbuminuria                                                                                                                                                                 | 4.52 (2.67 - 7.66)<br><.0001                            | 4.85 (2.86 - 8.22)<br><.0001                            | 4.71 (2.78 - 7.99)<br><.0001                            |
| <=6.9% (<=52 mmol/mol) - Not Normoalbuminuria                                                                                                                                                             | 3.24 (2.21 - 4.74)<br><.0001                            | 3.23 (2.21 - 4.73)<br><.0001                            | 2.97 (2.03 - 4.36)<br><.0001                            |
| 7.0-7.8% (53-62 mmol/mol) - Not Normoalbuminuria                                                                                                                                                          | 4.54 (3.67 - 5.61)<br><.0001                            | 4.48 (3.62 - 5.54)<br><.0001                            | 3.91 (3.15 - 4.87)<br><.0001                            |
| 7.9-8.7% (63-72 mmol/mol) - Not Normoalbuminuria                                                                                                                                                          | 5.29 (4.37 - 6.39)<br><.0001                            | 5.08 (4.20 - 6.15)<br><.0001                            | 4.71 (3.88 - 5.70)<br><.0001                            |
| 8.8-9.6% 73-82 (mmol/mol) - Not Normoalbuminuria                                                                                                                                                          | 6.06 (4.79 - 7.67)<br><.0001                            | 5.74 (4.53 - 7.27)<br><.0001                            | 5.08 (4.00 - 6.45)<br><.0001                            |
| >=9.7% (>=83 mmol/mol) - Not Normoalbuminuria                                                                                                                                                             | 12.80 (9.62 - 17.02)<br><.0001                          | 12.18 (9.15 - 16.22)<br><.0001                          | 10.74 (8.04 - 14.33)<br><.0001                          |
| Time updated mean HbA1c categories and eGFR                                                                                                                                                               | n events=1972<br>N subjects=106947<br>data used = 98.8% | n events=1972<br>N subjects=106947<br>data used = 98.8% | n events=1963<br>N subjects=105641<br>data used = 97.6% |
| Controls (reference)                                                                                                                                                                                      | 1.00                                                    | 1.00                                                    | 1.00                                                    |
| <=6.9% (<=52 mmol/mol) - eGFR>=60                                                                                                                                                                         | 1.32 (0.96 - 1.83)<br>0.089                             | 1.38 (1.00 - 1.91)<br>0.048                             | 1.40 (1.01 - 1.94)<br>0.040                             |
| 7.0-7.8% (53-62 mmol/mol) - eGFR>=60                                                                                                                                                                      | 2.09 (1.73 - 2.54)<br><.0001                            | 2.09 (1.72 - 2.53)<br><.0001                            | 2.05 (1.69 - 2.49)<br><.0001                            |
| 7.9-8.7% (63-72 mmol/mol) - eGFR>=60                                                                                                                                                                      | 2.42 (2.01 - 2.90)<br><.0001                            | 2.36 (1.96 - 2.84)<br><.0001                            | 2.30 (1.91 - 2.76)<br><.0001                            |
| 8.8-9.6% 73-82 (mmol/mol) - eGFR>=60                                                                                                                                                                      | 3.13 (2.43 - 4.02)<br><.0001                            | 3.05 (2.37 - 3.92)<br><.0001                            | 2.88 (2.24 - 3.71)<br><.0001                            |
| >=9.7% (>=83 mmol/mol) - eGFR>=60                                                                                                                                                                         | 5.80 (4.03 - 8.34)<br><.0001                            | 5.98 (4.16 - 8.60)<br><.0001                            | 5.75 (4.00 - 8.27)<br><.0001                            |
| <=6.9% (<=52 mmol/mol) - eGFR<60                                                                                                                                                                          | 4.02 (2.52 - 6.41)<br><.0001                            | 4.04 (2.54 - 6.44)<br><.0001                            | 3.70 (2.32 - 5.90)<br><.0001                            |
| 7.0-7.8% (53-62 mmol/mol) - eGFR<60                                                                                                                                                                       | 5.81 (4.48 - 7.53)<br><.0001                            | 5.87 (4.52 - 7.60)<br><.0001                            | 4.85 (3.71 - 6.34)<br><.0001                            |
| 7.9-8.7% (63-72 mmol/mol) - eGFR<60                                                                                                                                                                       | 6.44 (4.94 - 8.41)<br><.0001                            | 6.36 (4.88 - 8.30)<br><.0001                            | 5.58 (4.26 - 7.30)<br><.0001                            |
| 8.8-9.6% 73-82 (mmol/mol) - eGFR<60                                                                                                                                                                       | 10.28 (7.59 - 13.92)<br><.0001                          | 9.62 (7.10 - 13.04)<br><.0001                           | 8.33 (6.13 - 11.33)<br><.0001                           |
| >=9.7% (>=83 mmol/mol) - eGFR<60                                                                                                                                                                          | 17.04 (12.06 - 24.06)<br><.0001                         | 16.27 (11.52 - 23.00)<br><.0001                         | 13.81 (9.73 - 19.59)<br><.0001                          |
| Model 1: adjusted for time-updated age<br>Model 2: additionally stratified by diabetes duration<br>Model 3: additionally adjusted for born in Sweden, maximum education level and baseline comorbidities. |                                                         |                                                         |                                                         |



**Table 2.3 Adjusted hazard ratios for AMI or CHD death and 95% confidence intervals for time-updated mean HbA1c categories together with albuminuria and eGFR versus the reference group examined by Cox regression - Women**

| AMI or CHD death                                                                                                                                                                                          | Hazard ratio (95% CI)<br>p-value                       |                                                        |                                                        |
|-----------------------------------------------------------------------------------------------------------------------------------------------------------------------------------------------------------|--------------------------------------------------------|--------------------------------------------------------|--------------------------------------------------------|
|                                                                                                                                                                                                           | Model 1                                                | Model 2                                                | Model 3                                                |
| Time updated mean HbA1c categories and albuminuria                                                                                                                                                        | n events=1045<br>N subjects=88262<br>data used = 98.5% | n events=1045<br>N subjects=88262<br>data used = 98.5% | n events=1031<br>N subjects=87352<br>data used = 97.4% |
| Controls (reference)                                                                                                                                                                                      | 1.00                                                   | 1.00                                                   | 1.00                                                   |
| <=6.9% (<=52 mmol/mol) - Normoalbuminuria                                                                                                                                                                 | 3.17 (2.15 - 4.66)<br><.0001                           | 3.20 (2.17 - 4.71)<br><.0001                           | 3.16 (2.14 - 4.65)<br><.0001                           |
| 7.0-7.8% (53-62 mmol/mol) - Normoalbuminuria                                                                                                                                                              | 3.88 (3.01 - 5.00)<br><.0001                           | 3.84 (2.98 - 4.96)<br><.0001                           | 3.61 (2.79 - 4.67)<br><.0001                           |
| 7.9-8.7% (63-72 mmol/mol) - Normoalbuminuria                                                                                                                                                              | 5.40 (4.29 - 6.79)<br><.0001                           | 5.38 (4.27 - 6.77)<br><.0001                           | 4.99 (3.95 - 6.30)<br><.0001                           |
| 8.8-9.6% 73-82 (mmol/mol) - Normoalbuminuria                                                                                                                                                              | 7.91 (5.81 - 10.76)<br><.0001                          | 7.95 (5.84 - 10.83)<br><.0001                          | 6.36 (4.65 - 8.71)<br><.0001                           |
| >=9.7% (>=83 mmol/mol) - Normoalbuminuria                                                                                                                                                                 | 15.00 (9.95 - 22.61)<br><.0001                         | 15.66 (10.38 - 23.61)<br><.0001                        | 13.12 (8.68 - 19.84)<br><.0001                         |
| <=6.9% (<=52 mmol/mol) - Not Normoalbuminuria                                                                                                                                                             | 10.14 (6.49 - 15.85)<br><.0001                         | 9.96 (6.37 - 15.57)<br><.0001                          | 7.83 (4.98 - 12.33)<br><.0001                          |
| 7.0-7.8% (53-62 mmol/mol) - Not Normoalbuminuria                                                                                                                                                          | 9.71 (7.28 - 12.95)<br><.0001                          | 9.53 (7.14 - 12.71)<br><.0001                          | 8.04 (6.00 - 10.77)<br><.0001                          |
| 7.9-8.7% (63-72 mmol/mol) - Not Normoalbuminuria                                                                                                                                                          | 16.07 (12.90 - 20.02)<br><.0001                        | 15.72 (12.62 - 19.58)<br><.0001                        | 14.01 (11.19 - 17.53)<br><.0001                        |
| 8.8-9.6% 73-82 (mmol/mol) - Not Normoalbuminuria                                                                                                                                                          | 16.50 (12.30 - 22.12)<br><.0001                        | 16.09 (12.00 - 21.58)<br><.0001                        | 13.65 (10.14 - 18.38)<br><.0001                        |
| >=9.7% (>=83 mmol/mol) - Not Normoalbuminuria                                                                                                                                                             | 40.90 (30.59 - 54.70)<br><.0001                        | 39.85 (29.77 - 53.34)<br><.0001                        | 31.82 (23.63 - 42.84)<br><.0001                        |
| Time updated mean HbA1c categories and eGFR                                                                                                                                                               | n events=1047<br>N subjects=88623<br>data used = 98.9% | n events=1047<br>N subjects=88623<br>data used = 98.9% | n events=1033<br>N subjects=87705<br>data used = 97.8% |
| Controls (reference)                                                                                                                                                                                      | 1.00                                                   | 1.00                                                   | 1.00                                                   |
| <=6.9% (<=52 mmol/mol) - eGFR>=60                                                                                                                                                                         | 3.13 (2.09 - 4.67)<br><.0001                           | 3.17 (2.12 - 4.74)<br><.0001                           | 3.11 (2.08 - 4.64)<br><.0001                           |
| 7.0-7.8% (53-62 mmol/mol) - eGFR>=60                                                                                                                                                                      | 3.79 (2.93 - 4.91)<br><.0001                           | 3.76 (2.90 - 4.87)<br><.0001                           | 3.54 (2.73 - 4.59)<br><.0001                           |
| 7.9-8.7% (63-72 mmol/mol) - eGFR>=60                                                                                                                                                                      | 6.90 (5.62 - 8.48)<br><.0001                           | 6.87 (5.59 - 8.44)<br><.0001                           | 6.30 (5.11 - 7.77)<br><.0001                           |
| 8.8-9.6% 73-82 (mmol/mol) - eGFR>=60                                                                                                                                                                      | 9.37 (7.15 - 12.27)<br><.0001                          | 9.41 (7.18 - 12.34)<br><.0001                          | 7.96 (6.05 - 10.47)<br><.0001                          |
| >=9.7% (>=83 mmol/mol) - eGFR>=60                                                                                                                                                                         | 13.66 (9.31 - 20.02)<br><.0001                         | 14.14 (9.64 - 20.73)<br><.0001                         | 11.85 (8.06 - 17.42)<br><.0001                         |
| <=6.9% (<=52 mmol/mol) - eGFR<60                                                                                                                                                                          | 8.55 (5.62 - 12.99)<br><.0001                          | 8.47 (5.57 - 12.87)<br><.0001                          | 7.15 (4.68 - 10.94)<br><.0001                          |
| 7.0-7.8% (53-62 mmol/mol) - eGFR<60                                                                                                                                                                       | 9.42 (7.14 - 12.42)<br><.0001                          | 9.28 (7.04 - 12.24)<br><.0001                          | 8.03 (6.05 - 10.66)<br><.0001                          |
| 7.9-8.7% (63-72 mmol/mol) - eGFR<60                                                                                                                                                                       | 10.69 (8.26 - 13.82)<br><.0001                         | 10.60 (8.19 - 13.70)<br><.0001                         | 9.74 (7.51 - 12.63)<br><.0001                          |
| 8.8-9.6% 73-82 (mmol/mol) - eGFR<60                                                                                                                                                                       | 14.01 (9.90 - 19.83)<br><.0001                         | 13.82 (9.77 - 19.56)<br><.0001                         | 10.57 (7.41 - 15.07)<br><.0001                         |
| >=9.7% (>=83 mmol/mol) - eGFR<60                                                                                                                                                                          | 48.25 (35.68 - 65.26)<br><.0001                        | 47.61 (35.16 - 64.47)<br><.0001                        | 37.86 (27.76 - 51.62)<br><.0001                        |
| Model 1: adjusted for time-updated age<br>Model 2: additionally stratified by diabetes duration<br>Model 3: additionally adjusted for born in Sweden, maximum education level and baseline comorbidities. |                                                        |                                                        |                                                        |

**Table 3. Risk factors of coronary events in males and females with type 1 diabetes Male vs Female with respect to patient characteristics and medical data during study before AMI/CHD death.**

|                                                       | Men<br>(n=18178)                               | Women<br>(n=14992)                             | p-value |
|-------------------------------------------------------|------------------------------------------------|------------------------------------------------|---------|
| Age at event/censoring                                | 42.3 (15.3)<br>41.0 (18.0; 93.0)<br>n=18178    | 43.0 (15.6)<br>42.0 (18.0; 94.0)<br>n=14992    | 0.0001  |
| Diabetes duration at baseline                         | 19.3 (14.3)<br>17.0 (0.0; 88.0)<br>n=18178     | 20.7 (14.6)<br>18.0 (0.0; 85.0)<br>n=14992     | <.0001  |
| Time to AMI/CHD death or censoring (years)            | 7.81 (4.29)<br>8.20 (0.01; 14.01)<br>n=18178   | 7.98 (4.28)<br>8.50 (0.01; 14.01)<br>n=14992   | 0.0002  |
| Born in Sweden                                        | 17166 (94.4%)                                  | 13964 (93.1%)                                  | <.0001  |
| Education category                                    |                                                |                                                |         |
| Low                                                   | 3563 (19.8%)                                   | 2659 (17.9%)                                   |         |
| Mid                                                   | 9423 (52.3%)                                   | 7134 (48.0%)                                   |         |
| High                                                  | 5044 (28.0%)                                   | 5079 (34.2%)                                   | <.0001  |
| AF (I48)                                              | 136 (0.7%)                                     | 59 (0.4%)                                      | <.0001  |
| CHD (I20-I25)                                         | 393 (2.2%)                                     | 321 (2.1%)                                     | 0.93    |
| HF (I50)                                              | 173 (1.0%)                                     | 135 (0.9%)                                     | 0.67    |
| Valve disease (I05-I09,I34-I36)                       | 57 (0.3%)                                      | 46 (0.3%)                                      | 0.99    |
| Stroke (I61-I64)                                      | 259 (1.4%)                                     | 176 (1.2%)                                     | 0.051   |
| Cancer (C00-C97)                                      | 246 (1.4%)                                     | 305 (2.0%)                                     | <.0001  |
| HbA1c (mmol/mol, IFCC) at baseline                    | 65.4 (15.5)<br>65.0 (27.0; 145.0)<br>n=17316   | 66.2 (16.2)<br>65.0 (26.0; 145.0)<br>n=14263   | 0.0006  |
| Mean HbA1c (mmol/mol, IFCC)                           | 64.9 (12.8)<br>64.0 (27.0; 137.0)<br>n=18079   | 65.6 (13.4)<br>64.5 (27.0; 142.0)<br>n=14900   | 0.0002  |
| HbA1c category at baseline                            |                                                |                                                |         |
| <=6.9% (<=52 mmol/mol)                                | 3386 (19.6%)                                   | 2678 (18.8%)                                   |         |
| 7.0-7.8% (53-62 mmol/mol)                             | 4175 (24.1%)                                   | 3403 (23.9%)                                   |         |
| 7.9-8.7% (63-72 mmol/mol)                             | 4829 (27.9%)                                   | 3901 (27.4%)                                   |         |
| 8.8-9.6% 73-82 (mmol/mol)                             | 2919 (16.9%)                                   | 2383 (16.7%)                                   |         |
| >=9.7% (>=83 mmol/mol)                                | 2007 (11.6%)                                   | 1898 (13.3%)                                   | 0.0004  |
| Mean HbA1c category                                   |                                                |                                                |         |
| <=6.9% (<=52 mmol/mol)                                | 2875 (15.9%)                                   | 2261 (15.2%)                                   |         |
| 7.0-7.8% (53-62 mmol/mol)                             | 5505 (30.4%)                                   | 4408 (29.6%)                                   |         |
| 7.9-8.7% (63-72 mmol/mol)                             | 5450 (30.1%)                                   | 4537 (30.4%)                                   |         |
| 8.8-9.6% 73-82 (mmol/mol)                             | 2751 (15.2%)                                   | 2276 (15.3%)                                   |         |
| >=9.7% (>=83 mmol/mol)                                | 1498 (8.3%)                                    | 1418 (9.5%)                                    | 0.0002  |
| SBP (mmHg) at baseline                                | 128.6 (16.2)<br>125.0 (80.0; 240.0)<br>n=16963 | 124.5 (17.4)<br>120.0 (80.0; 222.0)<br>n=13869 | <.0001  |
| Mean SBP (mmHg)                                       | 128.4 (13.0)<br>126.8 (81.3; 220.0)<br>n=17993 | 124.2 (14.1)<br>122.0 (82.5; 220.0)<br>n=14793 | <.0001  |
| BMI at baseline (kg/m2)                               | 25.0 (3.7)<br>24.5 (15.6; 55.7)<br>n=15971     | 25.1 (4.4)<br>24.3 (14.0; 69.9)<br>n=12973     | 0.0043  |
| Mean BMI (kg/m2)                                      | 25.5 (3.7)<br>25.1 (15.6; 55.7)<br>n=17623     | 25.5 (4.6)<br>24.6 (13.6; 74.5)<br>n=14450     | <.0001  |
| Smoking status at baseline                            | 2038 (12.1%)                                   | 2154 (15.5%)                                   | <.0001  |
| Last information about smoking status                 | 2017 (11.3%)                                   | 2021 (13.7%)                                   | <.0001  |
| Use of blood pressure lowering medication at baseline | 3788 (21.9%)                                   | 2847 (20.1%)                                   | <.0001  |
| Last use of blood pressure lowering medication        | 7184 (40.0%)                                   | 5326 (36.0%)                                   | <.0001  |

|                                                     | <b>Men<br/>(n=18178)</b>                    | <b>Women<br/>(n=14992)</b>                  | <b>p-value</b> |
|-----------------------------------------------------|---------------------------------------------|---------------------------------------------|----------------|
| <b>HDL (mmol/l) at baseline</b>                     | 1.42 (0.41)<br>1.40 (0.30; 3.80)<br>n=6465  | 1.66 (0.47)<br>1.60 (0.40; 4.00)<br>n=5310  | <.0001         |
| <b>Mean HDL (mmol/l)</b>                            | 1.46 (0.38)<br>1.42 (0.37; 4.00)<br>n=16109 | 1.71 (0.44)<br>1.67 (0.43; 3.90)<br>n=13351 | <.0001         |
| <b>LDL (mmol/l) at baseline</b>                     | 2.66 (0.84)<br>2.57 (0.29; 8.59)<br>n=6126  | 2.67 (0.82)<br>2.58 (0.33; 8.62)<br>n=5043  | 0.51           |
| <b>Mean LDL (mmol/l)</b>                            | 2.69 (0.70)<br>2.63 (0.29; 8.58)<br>n=15743 | 2.65 (0.67)<br>2.59 (0.21; 8.44)<br>n=13067 | <.0001         |
| <b>Use of lipid lowering medication at baseline</b> | 1831 (10.9%)                                | 1425 (10.4%)                                | 0.12           |
| <b>Last use of lipid lowering medication</b>        | 6489 (36.1%)                                | 4713 (31.8%)                                | <.0001         |
| <b>Insulin method at baseline</b>                   |                                             |                                             |                |
| <b>MDI</b>                                          | 6711 (86.2%)                                | 5066 (82.1%)                                |                |
| <b>Pump</b>                                         | 1071 (13.8%)                                | 1106 (17.9%)                                | <.0001         |
| <b>Last insulin method</b>                          |                                             |                                             |                |
| <b>MDI</b>                                          | 14364 (84.2%)                               | 10892 (77.3%)                               |                |
| <b>Pump</b>                                         | 2689 (15.8%)                                | 3206 (22.7%)                                | <.0001         |
| <b>Albuminuria value at baseline</b>                |                                             |                                             |                |
| <b>Normoalbuminuria</b>                             | 5460 (80.6%)                                | 4513 (82.4%)                                |                |
| <b>Microalbuminuria</b>                             | 684 (10.1%)                                 | 556 (10.1%)                                 |                |
| <b>Macroalbuminuria</b>                             | 494 (7.3%)                                  | 298 (5.4%)                                  |                |
| <b>CKD stage 5</b>                                  | 133 (2.0%)                                  | 112 (2.0%)                                  | 0.0052         |
| <b>Last Albuminuria category value</b>              |                                             |                                             |                |
| <b>Normoalbuminuria</b>                             | 12827 (77.9%)                               | 11193 (82.2%)                               |                |
| <b>Microalbuminuria</b>                             | 2040 (12.4%)                                | 1449 (10.6%)                                |                |
| <b>Macroalbuminuria</b>                             | 1239 (7.5%)                                 | 723 (5.3%)                                  |                |
| <b>CKD stage 5</b>                                  | 359 (2.2%)                                  | 257 (1.9%)                                  | <.0001         |

For categorical variables n (%) is presented.  
For continuous variables Mean (SD) / Median (Min; Max) / n= is presented.  
For comparison between groups Fisher's Exact test (lowest 1-sided  
p-value multiplied by 2) was used for dichotomous variables and the  
Mantel-Haenszel Chi Square test was used for ordered categorical variables  
and the Mann-Whitney U-test was used for continuous variables.

**Figure 1. Hazard ratios and CIs for male and female diabetic patients (Model 3) - effect of various HbA1c categories vs 48-52 mmol/mol on time to first AMI or CHD death**

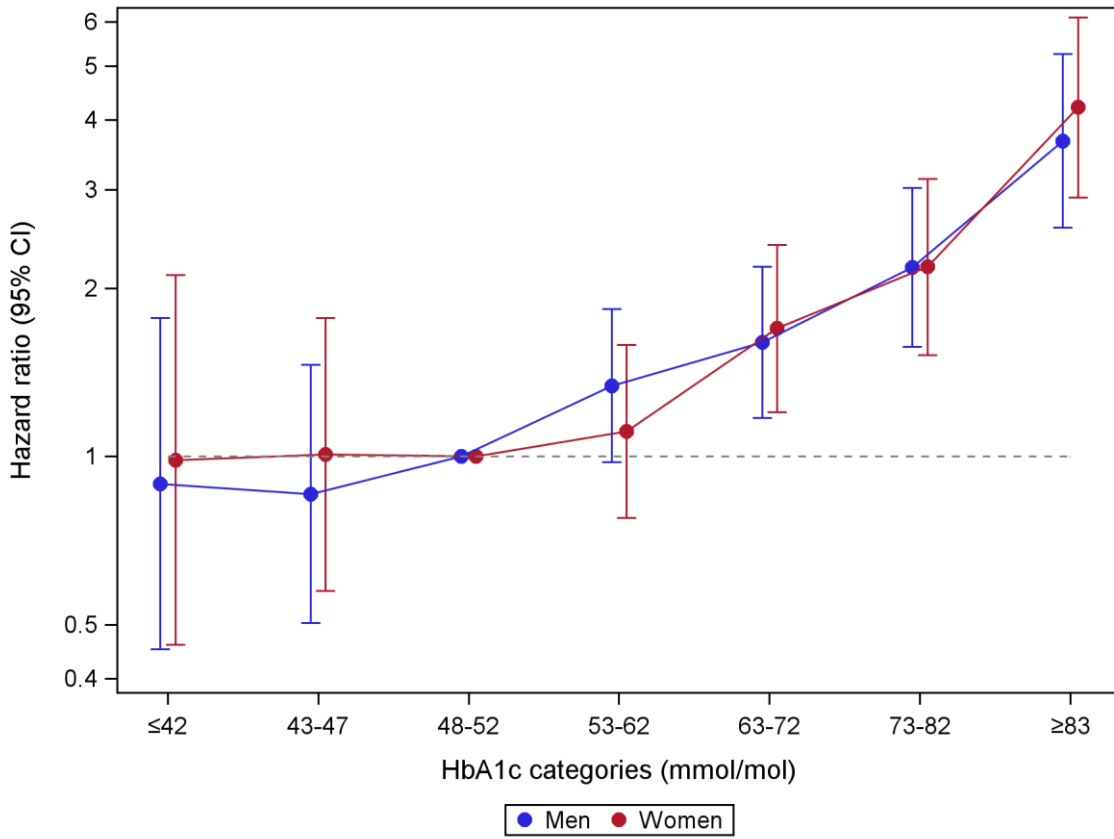

Supplement: inline-supplementary-material-1 [file inline-supplementary-material-1.pdf]
